# Supplementary material for: Does Academic Stress Heighten Medical Students' Anxiety and Depression Risk? A Comparative Analysis of Varied Influencing Mechanisms on Interpersonal Relationship, Sleep quality and Academic Stress across Medical Majors
Source: Research Square preprint supplement (doi:10.21203/rs.3.rs-7841868/v1), 2026-01-23
Supplement: Supplementary file 1 [file b05bb860b0f4fd088b7764c4.docx]

Supplementary Material

# 1. General Information Questionnaire

Please answer the following items.

| **Item** | **Response Options** |
| --- | --- |
| 1) Gender | A. Male B. Female |
| 2) Grade | A.First year B. Second year C. Third year D.Fourth year |
| 3) Academic stress during this period | A. Almost none B. A little C. Moderate D. High E. Very high |
| 4) Interpersonal relationship status | A. Very good B. Good C. Average D. Poor E. Very poor |

# 2. Pittsburgh Sleep Quality Index (PSQI)

The following questions relate to your usual sleep habits during the past month only. Your answers should indicate the most accurate reply for the majority of days and nights in the past month. Please answer all questions.

1. During the past month, what time have you usually gone to bed at night?

2. During the past month, how long (in minutes) has it usually taken you to fall asleep each night?

3. During the past month, what time have you usually gotten up in the morning?

4. During the past month, how many hours of actual sleep did you get at night? (This may be different than the number of hours you spent in bed.)

5. During the past month, how often have you had trouble sleeping because you…

• a) Cannot get to sleep within 30 minutes

A.Not during the past month B.Less than once a week C.Once or twice a week D.Three or more times a week

• b) Wake up in the middle of the night or early morning

A.Not during the past month B.Less than once a week C.Once or twice a week D.Three or more times a week

• c) Have to get up to use the bathroom

A.Not during the past month B.Less than once a week C.Once or twice a week D.Three or more times a week

• d) Cannot breathe comfortably

A.Not during the past month B.Less than once a week C.Once or twice a week D.Three or more times a week

• e) Cough or snore loudly

A.Not during the past month B.Less than once a week C.Once or twice a week D.Three or more times a week

• f) Feel too cold

A.Not during the past month B.Less than once a week C.Once or twice a week D.Three or more times a week

• g) Feel too hot

A.Not during the past month B.Less than once a week C.Once or twice a week D.Three or more times a week

• h) Had bad dreams

A.Not during the past month B.Less than once a week C.Once or twice a week D.Three or more times a week

• i) Have pain

A.Not during the past month B.Less than once a week C.Once or twice a week D.Three or more times a week

• j) Other reason(s), please describe: ____________

How often during the past month have you had trouble sleeping because of this?

A.Not during the past month B.Less than once a week C.Once or twice a week D.Three or more times a week

6. During the past month, how would you rate your sleep quality overall?

A.Very good B.Fairly good C. Fairly bad D. Very bad

7. During the past month, how often have you taken medicine to help you sleep (prescribed or “over the counter”)?

A.Not during the past month B.Less than once a week C.Once or twice a week D.Three or more times a week

8. During the past month, how often have you had trouble staying awake while driving, eating meals, or engaging in social activity?

A.Not during the past month B.Less than once a week C.Once or twice a week D.Three or more times a week

9. During the past month, how much of a problem has it been for you to keep up enough enthusiasm to get things done?

A.No problem at all B.Only a very slight problem C.Somewhat of a problem D.A very big problem

# 3. Zung Self-Rating Anxiety Scale (SAS)

Please mark how often each statement applied to you within the specified recall period.

|  | 1. **None or a little of the time** | **B.Some of the time** | **C.Good part of the time** | **D.Most or all of the time** |
| --- | --- | --- | --- | --- |
| 1. I feel more nervous and anxious than usual. |  |  |  |  |
| 2. I feel afraid for no reason at all. |  |  |  |  |
| 3. I get upset easily or feel panicky. |  |  |  |  |
| 4. I feel like I’m falling apart and going to pieces. |  |  |  |  |
| 5. I feel that everything is all right and nothing bad will happen. |  |  |  |  |
| 6. My arms and legs shake and tremble. |  |  |  |  |
| 7. I am bothered by headaches, neck and back pains. |  |  |  |  |
| 8. I feel weak and get tired easily. |  |  |  |  |
| 9. I feel calm and can sit still easily.  have nightmares. |  |  |  |  |
| 10. I can feel my heart beating fast. |  |  |  |  |
| 11. I am bothered by dizzy spells. |  |  |  |  |
| 12. I have fainting spells or feel like it. |  |  |  |  |
| 13. I can breathe in and out easily. |  |  |  |  |
| 14. I get feelings of numbness and tingling in my fingers, toes. |  |  |  |  |
| 15. I am bothered by stomachaches or indigestion. |  |  |  |  |
| 16. I have to empty my bladder often. |  |  |  |  |
| 17. My hands are usually dry and warm. |  |  |  |  |
| 18. My face gets hot and blushes. |  |  |  |  |
| 19. I fall asleep easily and get a good night's rest. |  |  |  |  |
| 20. I have nightmares. |  |  |  |  |

# 4. Zung Self-Rating Depression Scale (SDS)

Please mark how often you felt or behaved this way during the past several days.

|  | 1. **None or a little of the time** | **B.Some of the time** | **C.Good part of the time** | **D.Most or all of the time** |
| --- | --- | --- | --- | --- |
| 1. I feel down-hearted and blue. |  |  |  |  |
| 2. Morning is when I feel the best. |  |  |  |  |
| 3. I have crying spells or feel like it. |  |  |  |  |
| 4. I have trouble sleeping at night. |  |  |  |  |
| 5. I eat as much as I used to. |  |  |  |  |
| 6. I still enjoy sex. |  |  |  |  |
| 7. I notice that I am losing weight. |  |  |  |  |
| 8. I have trouble with constipation. |  |  |  |  |
| 9. My heart beats faster than usual. |  |  |  |  |
| 10. I get tired for no reason. |  |  |  |  |
| 11. My mind is as clear as it used to be. |  |  |  |  |
| 12. I find it easy to do the things I used to. |  |  |  |  |
| 13. I am restless and can’t keep still. |  |  |  |  |
| 14. I feel hopeful about the future. |  |  |  |  |
| 15. I am more irritable than usual. |  |  |  |  |
| 16. I find it easy to make decisions. |  |  |  |  |
| 17. I feel that I am useful and needed. |  |  |  |  |
| 18. My life is pretty full. |  |  |  |  |
| 19. I feel that others would be better off if I were dead. |  |  |  |  |
| 20. I still enjoy the things I used to do. |  |  |  |  |
